# Supplementary material for: Reduced recombination with an optimized barrier layer on TiO2 in PbS/CdS core shell quantum dot sensitized solar cells
Source: Royal Society of Chemistry journal article supplement (doi:10.1039/c5nj02947c), 2016-01-01
Supplement: c5nj02947c1.pdf [file c5nj02947c1.pdf]

**Supporting Information**

**Reduced recombination with optimized barrier layer on TiO<sub>2</sub> in PbS/CdS core shell quantum dot sensitized solar cells**

Dinah Punnoose,<sup>a</sup> CH. S. S. Pavan Kumar,<sup>b</sup> Araveeti Eswar Reddy,<sup>a</sup> S. Srinivasa Rao,<sup>a</sup> Chebrolu Venkata Thulasi-Varma,<sup>a</sup> Sooyoung Kim,<sup>a</sup> Hyun Woong Seo,<sup>c</sup> Masaharu Shiratani,<sup>c</sup> Sang-Hwa Chung,<sup>a</sup> and Hee-Je Kim<sup>a</sup>

**S1. Cross-Sectional view of SEM image**

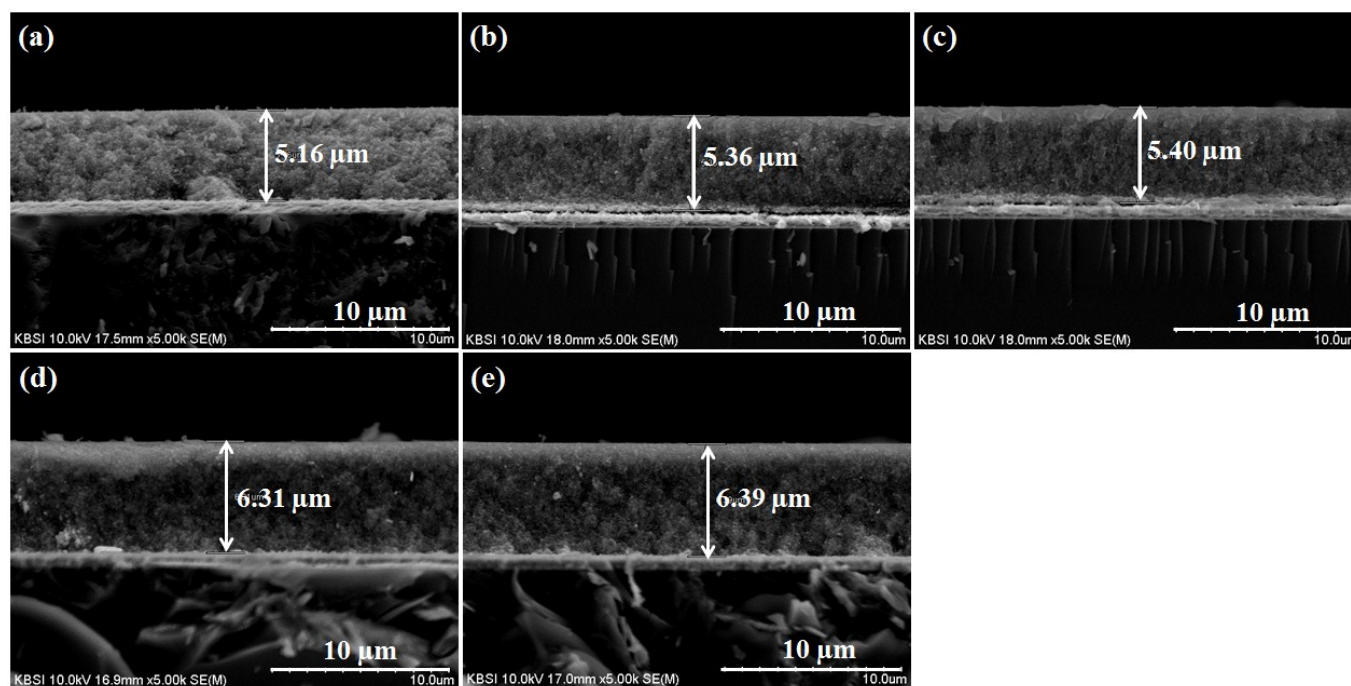

**Fig. S1** Cross-sectional view of SEM of (a) TiO<sub>2</sub>, (b) TiO<sub>2</sub>/MgO, (c) TiO<sub>2</sub>/Al<sub>2</sub>O<sub>3</sub>, (d) TiO<sub>2</sub>/MgO/Al<sub>2</sub>O<sub>3</sub> and (e) TiO<sub>2</sub>/Al<sub>2</sub>O<sub>3</sub>/MgO electrodes

## S2. EDX Analysis

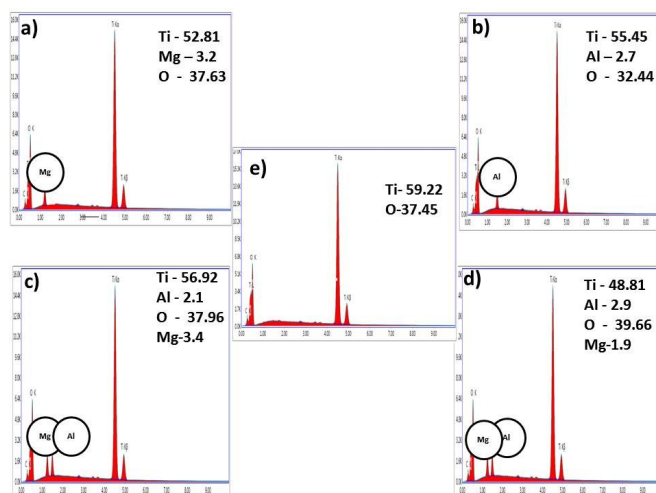

**Fig. S2** EDX analysis of a)  $\text{TiO}_2/\text{MgO}$  b)  $\text{TiO}_2/\text{Al}_2\text{O}_3$  c)  $\text{TiO}_2/\text{MgO}/\text{Al}_2\text{O}_3$  d)  $\text{TiO}_2/\text{Al}_2\text{O}_3/\text{MgO}$  e) Bare  $\text{TiO}_2$

## S3. AFM (Atomic Force Microscopy) analysis of PbS/CdS

The smoothest film with a root-mean square (RMS) roughness value of 10.83 nm was due to the PbS/CdS electrode. The power conversion efficiency of solar cells mainly depends on the low roughness of the surface. A reduction in the surface roughness of PbS/CdS tends to improve the conversion efficiency of the QDSSCs, which affects the optical properties.<sup>1</sup>

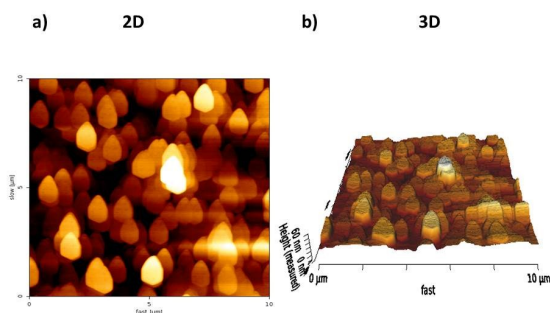

**Fig. S3** 2D (a and b) and 3D AFM images of PbS/CdS sensitized electrodes on the surface of  $\text{TiO}_2$

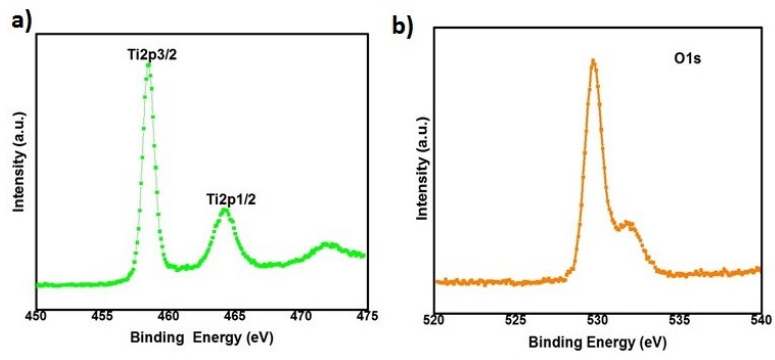

Fig. S4 XPS spectra of a) Ti (b) O
